# Supplementary material
Source: HighWire-hosted journal article supplement (https://jnnp.bmj.com/content/94/3/211)
Supplement: inline-supplementary-material-2 [file inline-supplementary-material-2.pdf]

## Supplementary Tables

Supplementary Table 1. N table of BioFINDER subjects with cognitive performance data over time.

| Year→ |      | 0   | 1   | 2   | 3   | 4   |
|-------|------|-----|-----|-----|-----|-----|
| CU    | A-T- | 558 | 160 | 353 | 146 | 329 |
|       | A+T- | 85  | 18  | 61  | 16  | 56  |
|       | A-T+ | 25  | 2   | 15  | 1   | 10  |
|       | A+T+ | 125 | 59  | 94  | 52  | 84  |
| MCI   | A-T- | 89  | 81  | 78  | 65  | 61  |
|       | A+T- | 34  | 30  | 31  | 26  | 24  |
|       | A-T+ | 7   | 7   | 7   | 7   | 7   |
|       | A+T+ | 133 | 124 | 118 | 106 | 96  |

Supplementary Table 2. Comparison of changes in CSF apoE and ferritin with other apolipoproteins and acute phase proteins across diagnostic categories in the BioFINDER cohort. Statistics are from multiple regression models of each of the analytes including age, sex, *APOE*  $\epsilon$ 4, and diagnosis as covariates.  $\beta$  represents one standard deviation change associated with diagnosis category (reference category is CU). Ferritin and apoE were highlighted as the primary analysis, the other analytes are included as exploratory comparative results. Bold indicates  $P < 0.05$ ; \*Indicates correction after multiple comparison between the two primary analysis of ferritin and apoE ( $\alpha/2 = 0.025$ ).

|                      |                             | CU      |      |       | MCI     |              |                            | AD      |                            |                            |
|----------------------|-----------------------------|---------|------|-------|---------|--------------|----------------------------|---------|----------------------------|----------------------------|
|                      |                             | $\beta$ | S.E. | P     | $\beta$ | S.E.         | P                          | $\beta$ | S.E.                       | P                          |
| apolipoprotein       | apoE                        | NA      | NA   | NA    | -0.121  | 0.072        | 0.092                      | 0.043   | 0.087                      | 0.625                      |
|                      | apoAI                       | NA      | NA   | NA    | 0.057   | 0.071        | 0.422                      | 0.232   | 0.086                      | <b>0.007</b>               |
|                      | apoAII                      | NA      | NA   | NA    | 0.080   | 0.071        | 0.263                      | 0.207   | 0.086                      | <b>0.016</b>               |
|                      | apoAIV                      | NA      | NA   | NA    | 0.160   | 0.070        | <b>0.022</b>               | 0.187   | 0.084                      | <b>0.027</b>               |
|                      | apoD                        | NA      | NA   | NA    | 0.089   | 0.069        | 0.197                      | 0.339   | 0.084                      | <b>5.3x10<sup>-5</sup></b> |
|                      | apoM                        | NA      | NA   | NA    | 0.132   | 0.073        | 0.070                      | 0.202   | 0.088                      | <b>0.022</b>               |
| acute phase proteins | ferritin                    | NA      | NA   | NA    | 0.077   | 0.069        | 0.264                      | 0.163   | 0.083                      | <b>0.050</b>               |
|                      | $\alpha$ 1 antichymotrypsin | NA      | NA   | NA    | 0.272   | 0.069        | <b>7.8x10<sup>-5</sup></b> | 0.499   | 0.083                      | <b>2.2x10<sup>-9</sup></b> |
|                      | $\alpha$ 1 antitrypsin      | NA      | NA   | NA    | 0.136   | 0.071        | 0.054                      | 0.309   | 0.086                      | <b>3.1x10<sup>-4</sup></b> |
|                      | ceruloplasmin               | NA      | NA   | NA    | 0.186   | 0.078        | <b>0.017</b>               | 0.179   | 0.094                      | 0.058                      |
|                      | complement C3               | NA      | NA   | NA    | 0.128   | 0.071        | 0.070                      | 0.271   | 0.085                      | <b>0.001</b>               |
|                      | $\alpha$ -fibrinogen        | NA      | NA   | NA    | 0.309   | 0.076        | <b>5.2x10<sup>-5</sup></b> | 0.313   | 0.093                      | <b>0.001</b>               |
|                      | $\beta$ -fibrinogen         | NA      | NA   | NA    | 0.245   | 0.075        | <b>0.001</b>               | 0.389   | 0.092                      | <b>2.5x10<sup>-5</sup></b> |
|                      | $\gamma$ -fibrinogen        | NA      | NA   | NA    | 0.188   | 0.070        | <b>0.008</b>               | 0.405   | 0.085                      | <b>2.0x10<sup>-6</sup></b> |
|                      | haptoglobin                 | NA      | NA   | NA    | 0.316   | 0.072        | <b>1.1x10<sup>-5</sup></b> | 0.281   | 0.087                      | <b>0.001</b>               |
| hemopexin            | NA                          | NA      | NA   | 0.149 | 0.070   | <b>0.033</b> | 0.410                      | 0.084   | <b>1.2x10<sup>-6</sup></b> |                            |

**Supplementary Table 3. Comparison of changes in CSF apoE and ferritin with other apolipoproteins and acute phase proteins in strata of A and T criteria in the BioFINDER cohort.** Statistics are from mixed effects models of each of analyte including age sex *APOE*  $\epsilon$ 4 A/T criteria as covariates.  $\beta$  represents one standard deviation change associated with A/T category (reference category is A-T-). Ferritin and apoE were highlighted as the primary analysis, the other analytes are included as exploratory comparative results. Bold indicates  $P < 0.05$ . ; \*Indicates correction after multiple comparison between the two primary analysis of ferritin and apoE ( $\alpha/2 = 0.025$ ).

|                      |                             | A-T-    |      |    | A+T-    |       |               | A-T+    |       |                             | A+T+    |       |                              |
|----------------------|-----------------------------|---------|------|----|---------|-------|---------------|---------|-------|-----------------------------|---------|-------|------------------------------|
|                      |                             | $\beta$ | S.E. | P  | $\beta$ | S.E.  | P             | $\beta$ | S.E.  | P                           | $\beta$ | S.E.  | P                            |
| apolipoprotein       | <b>apoE</b>                 | NA      | NA   | NA | -0.283  | 0.095 | <b>0.003*</b> | 0.709   | 0.184 | <b>1.2x10<sup>-4</sup>*</b> | 0.468   | 0.070 | <b>8.8x10<sup>-14</sup>*</b> |
|                      | apoA-I                      | NA      | NA   | NA | -0.105  | 0.097 | 0.280         | -0.134  | 0.187 | 0.473                       | 0.080   | 0.071 | 0.279                        |
|                      | apoA-II                     | NA      | NA   | NA | -0.143  | 0.097 | 0.140         | 0.059   | 0.183 | 0.746                       | 0.037   | 0.071 | 0.846                        |
|                      | apoA-IV                     | NA      | NA   | NA | -0.241  | 0.095 | <b>0.012</b>  | -0.034  | 0.181 | 0.852                       | 0.062   | 0.070 | 0.506                        |
|                      | apoD                        | NA      | NA   | NA | -0.208  | 0.094 | <b>0.027</b>  | 0.163   | 0.178 | 0.361                       | 0.220   | 0.068 | <b>0.001</b>                 |
|                      | apoM                        | NA      | NA   | NA | -0.042  | 0.100 | 0.672         | -0.016  | 0.187 | 0.931                       | 0.129   | 0.073 | 0.275                        |
| acute phase proteins | <b>ferritin</b>             | NA      | NA   | NA | 0.036   | 0.094 | 0.701         | 0.621   | 0.183 | <b>0.001*</b>               | 0.426   | 0.068 | <b>3.3x10<sup>-11</sup>*</b> |
|                      | $\alpha$ 1 antichymotrypsin | NA      | NA   | NA | -0.096  | 0.094 | 0.308         | 0.205   | 0.179 | 0.252                       | 0.236   | 0.069 | 0.257                        |
|                      | $\alpha$ 1 antitrypsin      | NA      | NA   | NA | -0.111  | 0.096 | 0.250         | -0.081  | 0.186 | 0.665                       | 0.090   | 0.071 | 0.606                        |
|                      | ceruloplasmin               | NA      | NA   | NA | -0.176  | 0.109 | 0.108         | 0.105   | 0.201 | 0.601                       | 0.072   | 0.079 | 0.370                        |
|                      | complement C3               | NA      | NA   | NA | -0.148  | 0.096 | 0.123         | 0.434   | 0.185 | <b>0.019</b>                | 0.173   | 0.070 | <b>0.001</b>                 |
|                      | $\alpha$ -fibrinogen        | NA      | NA   | NA | -0.092  | 0.108 | 0.391         | 0.333   | 0.199 | 0.095                       | 0.185   | 0.077 | 0.077                        |
|                      | $\beta$ -fibrinogen         | NA      | NA   | NA | -0.155  | 0.105 | 0.141         | 0.122   | 0.194 | 0.529                       | 0.186   | 0.076 | <b>5.3x10<sup>-10</sup></b>  |
|                      | $\gamma$ -fibrinogen        | NA      | NA   | NA | -0.132  | 0.096 | 0.169         | 0.090   | 0.182 | 0.620                       | 0.175   | 0.070 | <b>0.001</b>                 |
|                      | haptoglobin                 | NA      | NA   | NA | 0.140   | 0.099 | 0.158         | 0.032   | 0.190 | 0.868                       | 0.189   | 0.072 | 0.205                        |
|                      | hemopexin                   | NA      | NA   | NA | -0.137  | 0.095 | 0.151         | 0.154   | 0.180 | 0.395                       | 0.180   | 0.070 | 0.362                        |

**Supplementary Table 4. Comparison of changes in CSF apoE and ferritin in strata of A and T criteria in the BioFINDER cohort.** Subjects were limited to those that had ferritin values measured.

| Dx                    | CU          |             |              |              | MCI         |              |              |              | AD          |             |       |              | All          |
|-----------------------|-------------|-------------|--------------|--------------|-------------|--------------|--------------|--------------|-------------|-------------|-------|--------------|--------------|
|                       | -           | +           | -            | +            | -           | +            | -            | +            | -           | +           | -     | +            | All          |
| N                     | 531         | 83          | 21           | 113          | 89          | 33           | 6            | 124          | 8           | 19          | 0     | 149          | 1211         |
| Ferritin: ng/ml (SD)  | 9.63 (4.38) | 9.74 (4.39) | 13.49 (4.38) | 11.98 (4.70) | 9.49 (4.90) | 10.44 (4.52) | 13.03 (6.18) | 11.76 (4.67) | 7.93 (4.22) | 9.9 (4.88)  | NA NA | 11.95 (4.51) | 10.47 (4.65) |
| apoE: $\mu$ g/ml (SD) | 3.38 (1.06) | 3.22 (1.09) | 4.51 (1.05)  | 4.16 (1.11)  | 3.12 (1.12) | 2.8 (0.96)   | 3.81 (1.48)  | 3.74 (1.15)  | 2.35 (1.03) | 2.78 (1.21) | NA NA | 3.82 (1.27)  | 3.51 (1.16)  |

**Supplementary Table 5. Comparison of changes in CSF ferritin in strata of APOE and diagnosis in the BioFINDER cohort.** Subjects were limited to those that had ferritin values measured. Statistics are from a multiple regression model containing the following covariates: age, sex, APOE  $\epsilon$ 4, apoE level.

|            | APOE $\epsilon$ 4 -ve |       |        | APOE $\epsilon$ 4 +ve |       |        | P     |
|------------|-----------------------|-------|--------|-----------------------|-------|--------|-------|
|            | N                     | Mean  | SD     | N                     | Mean  | SD     |       |
| <b>All</b> | 692                   | 10.35 | (4.72) | 509                   | 10.63 | (4.69) | 0.994 |
| <b>CU</b>  | 502                   | 10.14 | (4.52) | 265                   | 9.97  | (4.63) | 0.670 |
| <b>MCI</b> | 132                   | 10.66 | (4.97) | 131                   | 11.11 | (4.74) | 0.724 |
| <b>AD</b>  | 58                    | 11.54 | (4.61) | 113                   | 11.61 | (4.69) | 0.214 |

**Supplementary Table 6. Demographics Table of ADNI subjects stratified by clinical (CU MCI dementia) and biomarker (A+/- and T+/-) criteria.** Values of  $A\beta_{42}$ , t-tau and p-tau181 are in pg/ml.

| Dx                              | CU          |            |            |            | MCI         |            |             |             | AD          |             |           |             |
|---------------------------------|-------------|------------|------------|------------|-------------|------------|-------------|-------------|-------------|-------------|-----------|-------------|
|                                 | -           | +          | -          | +          | -           | +          | -           | +           | -           | +           | -         | +           |
| A                               | -           | +          | -          | +          | -           | +          | -           | +           | -           | +           | -         | +           |
| T                               | -           | -          | +          | +          | -           | -          | +           | +           | -           | -           | +         | +           |
| N                               | 41          | 8          | 4          | 15         | 22          | 16         | 2           | 83          | 2           | 8           | 1         | 52          |
| Age: Mean (SD)                  | 75.0 (5.6)  | 74.1 (4.2) | 77.9 (4.7) | 78.1 (5.4) | 74.6 (7.9)  | 76.7 (3.4) | 72.3 (15.6) | 74.2 (7.6)  | 82.4 (3.0)  | 78.8 (4.6)  | 87.7 (NA) | 74.2 (7.8)  |
| Male Sex: N (%)                 | 22 (53.7)   | 4 (50.0)   | 1 (25.0)   | 10 (66.7)  | 19 (86.4)   | 12 (75.0)  | 1 (50.0)    | 50 (60.2)   | 1 (50.0)    | 6 (75.0)    | 1 (100)   | 27 (51.9)   |
| APOE $\epsilon$ 4: N (%)        | 4 (9.8)     | 6 (75.0)   | 1 (25.0)   | 7 (46.7)   | 1 (4.5)     | 10 (62.5)  | 1 (50.0)    | 57 (68.7)   | 0 (0.0)     | 6 (75.0)    | 0 (0.0)   | 39 (75.0)   |
| $A\beta_{42}$ : mean (SD)       | 1299 (263)  | 599 (103)  | 1333 (294) | 693 (194)  | 1153 (353)  | 502 (128)  | 1422 (134)  | 627 (173)   | 1189 (166)  | 570 (140)   | 1539 (NA) | 580 (207)   |
| t-tau: mean (SD)                | 188 (37)    | 218 (25)   | 298 (53)   | 327 (60)   | 185 (42)    | 202 (32)   | 287 (15)    | 379 (102)   | 154 (0.1)   | 204 (28)    | 294 (NA)  | 396 (117)   |
| $A\beta_{42}$ /t-tau: mean (SD) | 7 (1.5)     | 2.8 (0.5)  | 4.5 (0.6)  | 2.2 (0.7)  | 6.3 (1.7)   | 2.5 (0.7)  | 5 (0.2)     | 1.7 (0.6)   | 7.7 (1.1)   | 2.8 (0.6)   | 5.2 (NA)  | 1.5 (0.6)   |
| p-tau181: mean (SD)             | 16.7 (3.2)  | 20.1 (2.2) | 27.2 (4.7) | 33.3 (7.2) | 16 (3.8)    | 19.1 (3.3) | 26.4 (1.4)  | 38.9 (11.6) | 12.5 (0.9)  | 18.9 (3.0)  | 24.5 (NA) | 40.4 (13.9) |
| CDR-SB: mean (SD)               | 0.04 (0.13) | 0 (0.0)    | 0 (0.0)    | 0 (0.0)    | 1.46 (0.82) | 1.56 (1.0) | 2.50 (0.71) | 1.60 (0.86) | 4.75 (1.77) | 5.06 (2.16) | 3.5 (NA)  | 4.26 (1.46) |
| MMSE: mean (SD)                 | 29 (1.0)    | 28.9 (1.0) | 29.5 (0.6) | 29.3 (1.0) | 27.5 (1.7)  | 26.4 (1.6) | 29 (0.0)    | 26.7 (1.7)  | 25.5 (0.7)  | 22 (1.8)    | 24 (NA)   | 23.6 (1.8)  |

**Supplementary Table 7. Comparison of changes in CSF apoE and ferritin across diagnostic categories in the ADNI cohort.** Statistics are from multiple regression models of each of the analytes including age, sex, *APOE*  $\epsilon$ 4, and diagnosis as covariates.  $\beta$  represents one standard deviation change associated with diagnosis category (reference category is CU).

|                                    | CU          | MCI                  | AD                   |
|------------------------------------|-------------|----------------------|----------------------|
| <b>apoE (<math>\mu</math>g/ml)</b> |             |                      |                      |
| -mean; (S.D.)                      | 7.34 (1.99) | 7.06 (2.08)          | 6.76 (2.33)          |
| $-\beta$ ; (S.E.); P               | NA NA NA    | -0.042 (0.139) 0.760 | -0.296 (0.167) 0.078 |
| <b>ferritin (ng/ml)</b>            |             |                      |                      |
| -mean; (S.D.)                      | 6.47 (2.00) | 7.03 (2.75)          | 7.28 (3.04)          |
| $-\beta$ ; (S.E.); P               | NA NA NA    | 0.093 (0.141) 0.513  | 0.061 (0.170) 0.720  |

**Supplementary Table 8. Comparison of changes in CSF apoE and ferritin in strata of A and T criteria in the ADNI cohort.** Statistics are from multiple regression models of each of analyte including age, sex, *APOE*  $\epsilon$ 4, and A/T criteria as covariates.  $\beta$  represents one standard deviation change associated with A/T criteria category (reference category is A-T-). Bold indicates  $P < 0.05$ .

|                                    | A-T-        | A+T-                 | A-T+                       | A+T+                                                 |
|------------------------------------|-------------|----------------------|----------------------------|------------------------------------------------------|
| <b>apoE (<math>\mu</math>g/ml)</b> |             |                      |                            |                                                      |
| -mean; (S.D.)                      | 6.55 (1.66) | 5.58 (1.83)          | 8.13 (1.82)                | 7.24 (2.16)                                          |
| $-\beta$ ; (S.E.); P               | NA NA NA    | -0.354 (0.204) 0.084 | 0.913 (0.347) <b>0.009</b> | 0.545 (0.151) <b><math>3.6 \times 10^{-4}</math></b> |
| <b>ferritin (ng/ml)</b>            |             |                      |                            |                                                      |
| -mean; (S.D.)                      | 5.93 (2.01) | 5.98 (1.71)          | 7.92 (1.13)                | 7.42 (2.93)                                          |
| $-\beta$ ; (S.E.); P               | NA NA NA    | -0.160 (0.220) 0.468 | 0.945 (0.375) <b>0.012</b> | 0.445 (0.163) <b>0.007</b>                           |

**Supplementary Table 9. Association between ferritin and apoE levels with longitudinal CDR-SB and MMSE in CU and MCI BioFINDER subjects.**

Data are from mixed effects models of CDR-SB/MMSE including the indicated variables and their interaction with time.  $\beta$  represents a unit change in cognitive score per year per standard deviation change in each analyte. Ferritin and apoE were highlighted as the primary analysis of CDR-SB, the other analytes are included as exploratory comparative results. MMSE was included as supportive analysis. Bold indicates  $P < 0.05$ . \*Indicates correction after multiple comparison between the two primary analysis of ferritin and apoE, and the dual analysis of the group as a whole, and when stratified by A/T criteria ( $\alpha/4 = 0.0125$ ).

| Diagnosis                   | CU      |       |                            |         |       |              |         |       |                            |         |       |               | MCI     |       |                             |         |       |                            |         |       |                             |         |       |               |
|-----------------------------|---------|-------|----------------------------|---------|-------|--------------|---------|-------|----------------------------|---------|-------|---------------|---------|-------|-----------------------------|---------|-------|----------------------------|---------|-------|-----------------------------|---------|-------|---------------|
|                             | All     |       |                            | -       |       |              | +       |       |                            | +       |       |               | All     |       |                             | -       |       |                            | +       |       |                             |         |       |               |
| A                           | All     |       |                            | -       |       |              | +       |       |                            | +       |       |               | All     |       |                             | -       |       |                            | +       |       |                             |         |       |               |
| T                           | All     |       |                            | -       |       |              | +       |       |                            | +       |       |               | All     |       |                             | -       |       |                            | +       |       |                             |         |       |               |
| CDR-SB                      | $\beta$ | SE    | P                          | $\beta$ | SE    | P            | $\beta$ | SE    | P                          | $\beta$ | SE    | P             | $\beta$ | SE    | P                           | $\beta$ | SE    | P                          | $\beta$ | SE    | P                           | $\beta$ | SE    | P             |
| apoE                        | -0.003  | 0.016 | 0.860                      | -0.014  | 0.010 | 0.185        | 0.020   | 0.029 | 0.502                      | -0.195  | 0.086 | <b>0.025</b>  | 0.054   | 0.047 | 0.252                       | 0.116   | 0.074 | 0.118                      | 0.420   | 0.156 | <b>0.008*</b>               | -0.222  | 0.079 | <b>0.005*</b> |
| apoA1                       | 0.055   | 0.016 | <b>0.001</b>               | 0.032   | 0.010 | <b>0.001</b> | 0.144   | 0.035 | <b>6.2x10<sup>-5</sup></b> | 0.142   | 0.063 | <b>0.025</b>  | 0.024   | 0.043 | 0.585                       | 0.037   | 0.079 | 0.642                      | 0.214   | 0.159 | 0.184                       | -0.059  | 0.059 | 0.311         |
| apoA2                       | 0.040   | 0.016 | <b>0.013</b>               | 0.028   | 0.010 | <b>0.005</b> | 0.139   | 0.035 | <b>9.2x10<sup>-5</sup></b> | 0.096   | 0.067 | 0.153         | 0.022   | 0.045 | 0.627                       | -0.030  | 0.075 | 0.692                      | 0.314   | 0.188 | 0.097                       | 0.021   | 0.066 | 0.753         |
| apoA4                       | 0.053   | 0.017 | <b>0.001</b>               | 0.011   | 0.010 | 0.293        | 0.119   | 0.037 | <b>0.001</b>               | 0.170   | 0.064 | <b>0.009</b>  | -0.025  | 0.044 | 0.564                       | 0.029   | 0.072 | 0.693                      | 0.206   | 0.187 | 0.274                       | -0.075  | 0.064 | 0.248         |
| apoD                        | 0.037   | 0.017 | <b>0.030</b>               | 0.025   | 0.011 | <b>0.015</b> | 0.117   | 0.037 | <b>0.002</b>               | 0.070   | 0.067 | 0.300         | 0.063   | 0.041 | 0.120                       | 0.141   | 0.065 | <b>0.032</b>               | 0.520   | 0.157 | <b>0.001</b>                | -0.085  | 0.062 | 0.168         |
| apoM                        | 0.019   | 0.016 | 0.226                      | 0.023   | 0.009 | <b>0.013</b> | 0.142   | 0.037 | <b>1.7x10<sup>-4</sup></b> | -0.003  | 0.068 | 0.967         | 0.010   | 0.047 | 0.824                       | 0.117   | 0.073 | 0.111                      | 0.270   | 0.224 | 0.230                       | -0.141  | 0.072 | <b>0.049</b>  |
| ferritin                    | -0.012  | 0.016 | 0.458                      | -0.003  | 0.009 | 0.741        | -0.055  | 0.059 | 0.358                      | -0.176  | 0.068 | <b>0.010*</b> | 0.179   | 0.043 | <b>2.8x10<sup>-5*</sup></b> | 0.228   | 0.089 | <b>0.011*</b>              | 0.633   | 0.141 | <b>2.0x10<sup>-5*</sup></b> | 0.045   | 0.055 | 0.409         |
| $\alpha$ 1 antichymotrypsin | 0.055   | 0.016 | <b>0.001</b>               | 0.029   | 0.010 | <b>0.004</b> | 0.124   | 0.036 | <b>0.001</b>               | 0.075   | 0.068 | 0.266         | 0.080   | 0.045 | 0.074                       | 0.132   | 0.071 | 0.065                      | 0.317   | 0.184 | 0.088                       | 0.015   | 0.068 | 0.831         |
| $\alpha$ 1 antitrypsin      | 0.030   | 0.016 | 0.054                      | 0.019   | 0.010 | 0.054        | 0.085   | 0.031 | <b>0.007</b>               | 0.066   | 0.073 | 0.366         | 0.109   | 0.049 | <b>0.028</b>                | 0.121   | 0.090 | 0.180                      | 0.313   | 0.160 | 0.054                       | 0.038   | 0.070 | 0.581         |
| ceruloplasmin               | -0.036  | 0.018 | <b>0.045</b>               | -0.008  | 0.010 | 0.422        | 0.136   | 0.055 | <b>0.016</b>               | -0.126  | 0.067 | 0.061         | 0.020   | 0.048 | 0.672                       | 0.012   | 0.074 | 0.867                      | 0.134   | 0.193 | 0.489                       | 0.019   | 0.075 | 0.801         |
| complement C3               | 0.036   | 0.016 | <b>0.028</b>               | 0.016   | 0.010 | 0.123        | 0.091   | 0.032 | <b>0.005</b>               | 0.073   | 0.070 | 0.297         | 0.000   | 0.048 | 0.995                       | 0.088   | 0.082 | 0.283                      | -0.057  | 0.204 | 0.779                       | -0.023  | 0.068 | 0.732         |
| $\alpha$ -fibrinogen        | 0.017   | 0.019 | 0.353                      | 0.030   | 0.011 | <b>0.005</b> | 0.158   | 0.046 | <b>0.001</b>               | -0.088  | 0.075 | 0.243         | -0.025  | 0.043 | 0.566                       | -0.044  | 0.078 | 0.576                      | 0.244   | 0.164 | 0.140                       | -0.036  | 0.061 | 0.554         |
| $\beta$ -fibrinogen         | 0.029   | 0.019 | 0.121                      | 0.037   | 0.011 | <b>0.001</b> | 0.153   | 0.047 | <b>0.002</b>               | -0.076  | 0.075 | 0.312         | 0.011   | 0.044 | <b>0.803</b>                | -0.021  | 0.083 | 0.804                      | 0.255   | 0.148 | 0.089                       | 0.002   | 0.061 | 0.977         |
| $\gamma$ -fibrinogen        | 0.048   | 0.016 | <b>0.003</b>               | 0.031   | 0.010 | <b>0.001</b> | 0.056   | 0.037 | 0.131                      | 0.156   | 0.070 | <b>0.027</b>  | 0.142   | 0.048 | <b>0.003</b>                | 0.324   | 0.092 | <b>4.9x10<sup>-4</sup></b> | 0.342   | 0.155 | <b>0.030</b>                | 0.019   | 0.065 | 0.767         |
| haptoglobin                 | 0.011   | 0.016 | 0.480                      | 0.004   | 0.009 | 0.706        | -0.005  | 0.023 | 0.835                      | -0.029  | 0.069 | 0.679         | 0.104   | 0.040 | <b>0.010</b>                | 0.081   | 0.083 | 0.330                      | 0.258   | 0.172 | 0.137                       | 0.095   | 0.049 | 0.053         |
| hemopexin                   | 0.064   | 0.016 | <b>1.0x10<sup>-4</sup></b> | 0.027   | 0.010 | <b>0.007</b> | 0.162   | 0.035 | <b>1.1x10<sup>-5</sup></b> | 0.147   | 0.064 | <b>0.023</b>  | 0.018   | 0.042 | 0.659                       | 0.077   | 0.075 | 0.306                      | -0.058  | 0.131 | 0.657                       | 0.027   | 0.062 | 0.668         |
| MMSE                        | $\beta$ | SE    | P                          | $\beta$ | SE    | P            | $\beta$ | SE    | P                          | $\beta$ | SE    | P             | $\beta$ | SE    | P                           | $\beta$ | SE    | P                          | $\beta$ | SE    | P                           | $\beta$ | SE    | P             |
| apoE                        | 0.011   | 0.025 | 0.656                      | 0.027   | 0.023 | 0.235        | -0.011  | 0.052 | 0.834                      | 0.268   | 0.127 | <b>0.036</b>  | -0.139  | 0.065 | <b>0.034</b>                | 0.072   | 0.088 | 0.410                      | -0.266  | 0.165 | 0.109                       | 0.012   | 0.122 | 0.922         |
| apoA1                       | -0.042  | 0.025 | 0.089                      | -0.025  | 0.021 | 0.237        | -0.112  | 0.068 | 0.102                      | -0.159  | 0.097 | 0.100         | -0.011  | 0.062 | 0.865                       | -0.005  | 0.097 | 0.956                      | -0.141  | 0.176 | 0.427                       | 0.124   | 0.093 | 0.185         |
| apoA2                       | -0.022  | 0.025 | 0.377                      | -0.015  | 0.021 | 0.492        | -0.108  | 0.067 | 0.107                      | -0.121  | 0.101 | 0.233         | 0.033   | 0.064 | 0.605                       | 0.070   | 0.088 | 0.430                      | -0.383  | 0.204 | 0.063                       | 0.110   | 0.102 | 0.280         |
| apoA4                       | -0.026  | 0.026 | 0.322                      | -0.004  | 0.023 | 0.863        | -0.093  | 0.066 | 0.159                      | -0.078  | 0.101 | 0.440         | 0.006   | 0.064 | 0.924                       | -0.028  | 0.089 | 0.754                      | -0.156  | 0.206 | 0.451                       | 0.016   | 0.104 | 0.881         |
| apoD                        | 0.009   | 0.026 | 0.747                      | 0.021   | 0.023 | 0.353        | -0.145  | 0.068 | <b>0.035</b>               | -0.006  | 0.102 | 0.952         | -0.074  | 0.058 | 0.203                       | -0.053  | 0.079 | 0.505                      | -0.402  | 0.179 | <b>0.027</b>                | 0.073   | 0.098 | 0.453         |
| apoM                        | -0.018  | 0.023 | 0.449                      | -0.024  | 0.019 | 0.211        | -0.173  | 0.068 | <b>0.012</b>               | 0.106   | 0.107 | 0.321         | -0.002  | 0.066 | 0.971                       | -0.065  | 0.089 | 0.468                      | -0.627  | 0.234 | <b>0.009</b>                | 0.212   | 0.112 | 0.059         |
| ferritin                    | 0.043   | 0.025 | 0.088                      | 0.045   | 0.020 | 0.026        | 0.098   | 0.098 | 0.316                      | 0.250   | 0.101 | <b>0.014</b>  | -0.185  | 0.060 | <b>0.002</b>                | -0.128  | 0.107 | 0.231                      | -0.322  | 0.162 | <b>0.050</b>                | -0.061  | 0.083 | 0.464         |
| $\alpha$ 1 antichymotrypsin | -0.050  | 0.027 | 0.063                      | -0.024  | 0.023 | 0.284        | -0.176  | 0.066 | <b>0.009</b>               | -0.041  | 0.108 | 0.703         | 0.000   | 0.066 | 0.998                       | -0.004  | 0.088 | 0.960                      | -0.500  | 0.203 | <b>0.016</b>                | 0.084   | 0.109 | 0.444         |
| $\alpha$ 1 antitrypsin      | -0.021  | 0.025 | 0.399                      | -0.019  | 0.021 | 0.379        | -0.082  | 0.057 | 0.154                      | -0.061  | 0.112 | 0.587         | -0.064  | 0.069 | 0.353                       | 0.008   | 0.109 | 0.940                      | -0.288  | 0.170 | 0.094                       | 0.026   | 0.105 | 0.806         |
| ceruloplasmin               | 0.034   | 0.027 | 0.218                      | 0.003   | 0.023 | 0.904        | -0.237  | 0.095 | <b>0.015</b>               | 0.208   | 0.101 | <b>0.040</b>  | 0.095   | 0.068 | 0.161                       | 0.132   | 0.087 | 0.132                      | -0.413  | 0.213 | 0.055                       | 0.131   | 0.115 | 0.254         |
| complement C3               | -0.019  | 0.026 | 0.456                      | -0.001  | 0.022 | 0.959        | -0.082  | 0.059 | 0.165                      | -0.070  | 0.105 | 0.508         | 0.091   | 0.067 | 0.176                       | 0.031   | 0.098 | 0.751                      | 0.081   | 0.223 | 0.719                       | 0.097   | 0.103 | 0.350         |
| $\alpha$ -fibrinogen        | 0.023   | 0.028 | 0.416                      | -0.005  | 0.023 | 0.822        | -0.156  | 0.085 | 0.070                      | 0.229   | 0.109 | <b>0.036</b>  | -0.010  | 0.061 | 0.871                       | 0.128   | 0.093 | 0.168                      | -0.494  | 0.183 | <b>0.008</b>                | -0.016  | 0.094 | 0.866         |
| $\beta$ -fibrinogen         | 0.022   | 0.029 | 0.446                      | -0.019  | 0.024 | 0.434        | -0.095  | 0.082 | 0.247                      | 0.277   | 0.108 | <b>0.011</b>  | 0.009   | 0.064 | 0.882                       | 0.096   | 0.098 | 0.329                      | -0.418  | 0.173 | <b>0.017</b>                | 0.045   | 0.100 | 0.651         |
| $\gamma$ -fibrinogen        | -0.036  | 0.026 | 0.166                      | -0.039  | 0.022 | 0.068        | -0.024  | 0.071 | 0.731                      | -0.136  | 0.112 | 0.226         | -0.081  | 0.069 | 0.245                       | -0.174  | 0.114 | 0.130                      | -0.287  | 0.173 | 0.101                       | 0.053   | 0.102 | 0.603         |
| haptoglobin                 | -0.004  | 0.025 | 0.881                      | -0.001  | 0.021 | 0.954        | -0.006  | 0.055 | 0.911                      | 0.036   | 0.101 | 0.719         | -0.063  | 0.057 | 0.268                       | -0.026  | 0.099 | 0.790                      | -0.139  | 0.188 | 0.462                       | -0.043  | 0.076 | 0.573         |
| hemopexin                   | -0.051  | 0.026 | 0.052                      | -0.018  | 0.022 | 0.420        | -0.166  | 0.067 | <b>0.015</b>               | -0.137  | 0.100 | 0.171         | 0.034   | 0.060 | 0.567                       | 0.033   | 0.091 | 0.722                      | 0.070   | 0.144 | 0.630                       | 0.031   | 0.098 | 0.753         |

**Supplementary Table 10. Demographics table of BioFINDER subjects stratified by clinical diagnosis and I+ criteria.** Values of A $\beta$ <sub>42</sub>, t-tau and p-tau181 are in pg/ml.

| Dx                                        | CN         |            |            |            |            |            |            |             | MCI        |            |            |            |            |            |             |             |
|-------------------------------------------|------------|------------|------------|------------|------------|------------|------------|-------------|------------|------------|------------|------------|------------|------------|-------------|-------------|
|                                           | -          | -          | +          | +          | -          | -          | +          | +           | -          | -          | +          | +          | -          | +          | +           | +           |
| N                                         | 425        | 133        | 67         | 18         | 7          | 15         | 69         | 54          | 72         | 18         | 23         | 11         | 3          | 4          | 71          | 61          |
| Age: Mean (SD)                            | 70.0(6.0)  | 71.4(5.3)  | 71.7(4.4)  | 75.9(4.9)  | 76.3(4.2)  | 75.1(8.2)  | 73.2(5.2)  | 72.6(5.2)   | 68.5(5.9)  | 71.2(4.7)  | 71.8(5.3)  | 73.5(5.1)  | 69.7(3.2)  | 69.8(5.7)  | 71.1(5.0)   | 73.2(4.6)   |
| Female Sex: N (%)                         | 148(35)    | 66(50)     | 21(31)     | 8(44)      | 2(29)      | 8(53)      | 27(39)     | 31(57)      | 45(63)     | 17(94)     | 15(65)     | 8(73)      | 1(33)      | 4(100)     | 31(44)      | 33(54)      |
| APOE $\epsilon$ 4+ve: N (%)               | 108(26)    | 27(21)     | 36(55)     | 8(44)      | 3(43)      | 4(27)      | 43(62)     | 38(70)      | 15(21)     | 2(11)      | 16(70)     | 5(46)      | 1(33)      | 2(50)      | 49(69)      | 43(71)      |
| A $\beta$ <sub>42</sub> : mean (SD)       | 711(227)   | 809(239)   | 370(142)   | 377(118)   | 962(313)   | 1,020(260) | 351(97)    | 404(138)    | 664(206)   | 790(219)   | 336(115)   | 310(117)   | 901(356)   | 1,006(380) | 317(106)    | 372(135)    |
| t-tau: mean (SD)                          | 266(72)    | 305(72)    | 346(97)    | 372(98)    | 396(110)   | 484(86)    | 523(148)   | 588(231)    | 254(76)    | 310(60)    | 338(99)    | 400(152)   | 466(193)   | 402(99)    | 503(155)    | 650(235)    |
| A $\beta$ <sub>42</sub> /t-tau: mean (SD) | 0.13(0.02) | 0.13(0.02) | 0.08(0.02) | 0.08(0.02) | 0.12(0.02) | 0.11(0.02) | 0.06(0.02) | 0.06(0.01)  | 0.14(0.02) | 0.13(0.01) | 0.09(0.03) | 0.08(0.03) | 0.11(0.03) | 0.10(0.04) | 0.06(0.02)  | 0.06(0.02)  |
| p-tau181: mean (SD)                       | 33.9(9.5)  | 39.0(10.2) | 44.7(11.0) | 44.4(9.9)  | 75.9(24.4) | 69.4(7.3)  | 94.6(29.1) | 107.5(44.6) | 33.1(9.6)  | 40.3(8.8)  | 40.8(11.1) | 48.1(10.5) | 78.5(20.8) | 77.3(7.7)  | 102.8(36.0) | 129.6(46.8) |
| CDR-SB: mean (SD)                         | 0.2(0.4)   | 0.1(0.4)   | 0.1(0.3)   | 0.1(0.3)   | 0.0(0.0)   | 0.0(0.0)   | 0.3(0.6)   | 0.3(0.5)    | 1.3(0.9)   | 1.6(1.1)   | 1.3(0.9)   | 1.8(0.7)   | 0.5(0.0)   | 1.4(0.5)   | 1.3(0.9)    | 1.7(1.0)    |
| MMSE: mean (SD)                           | 29.0(1.0)  | 28.9(1.1)  | 29.0(0.9)  | 28.9(1.0)  | 28.9(1.1)  | 28.9(1.1)  | 28.6(1.3)  | 28.4(1.4)   | 27.5(1.9)  | 27.8(1.5)  | 27.7(2.0)  | 26.2(1.8)  | 28.0(2.0)  | 25.8(2.1)  | 26.6(1.7)   | 26.6(1.6)   |
