# Supplementary material
Source: HighWire-hosted journal article supplement (https://jnnp.bmj.com/content/94/3/211)
Supplement: inline-supplementary-material-3 [file inline-supplementary-material-3.pdf]

## Supplementary Figures

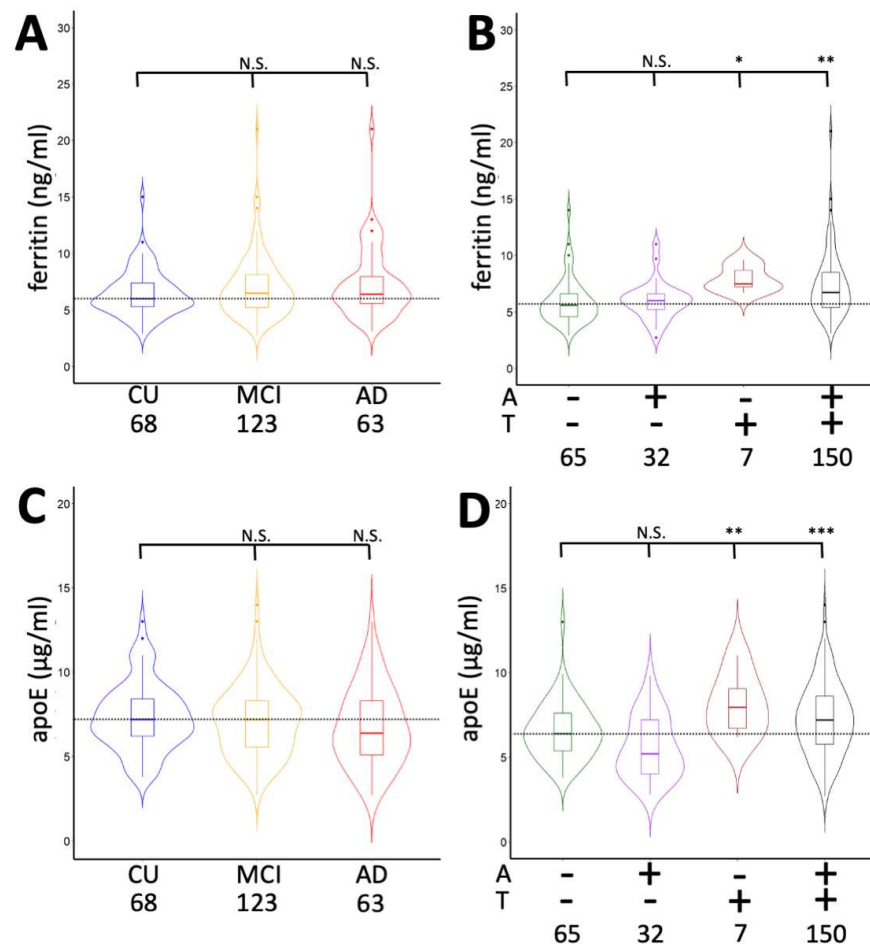

**Supplementary Figure 1. Ferritin and apoE levels in ADNI subjects. (A&B)** Violin plots of CSF ferritin (A) stratified by cognitive status and (B) A&T criteria. (C&D) Violin plots of CSF apoE (C) stratified by cognitive status and (D) A&T criteria. Statistics are from multiple regression models including age, sex, *APOE*  $\epsilon 4$ , apoE, ferritin, and either cognitive status or A&T criteria, where \* $p < 0.05$ ; \*\* $P < 0.01$ ; \*\*\* $P < 0.001$ .

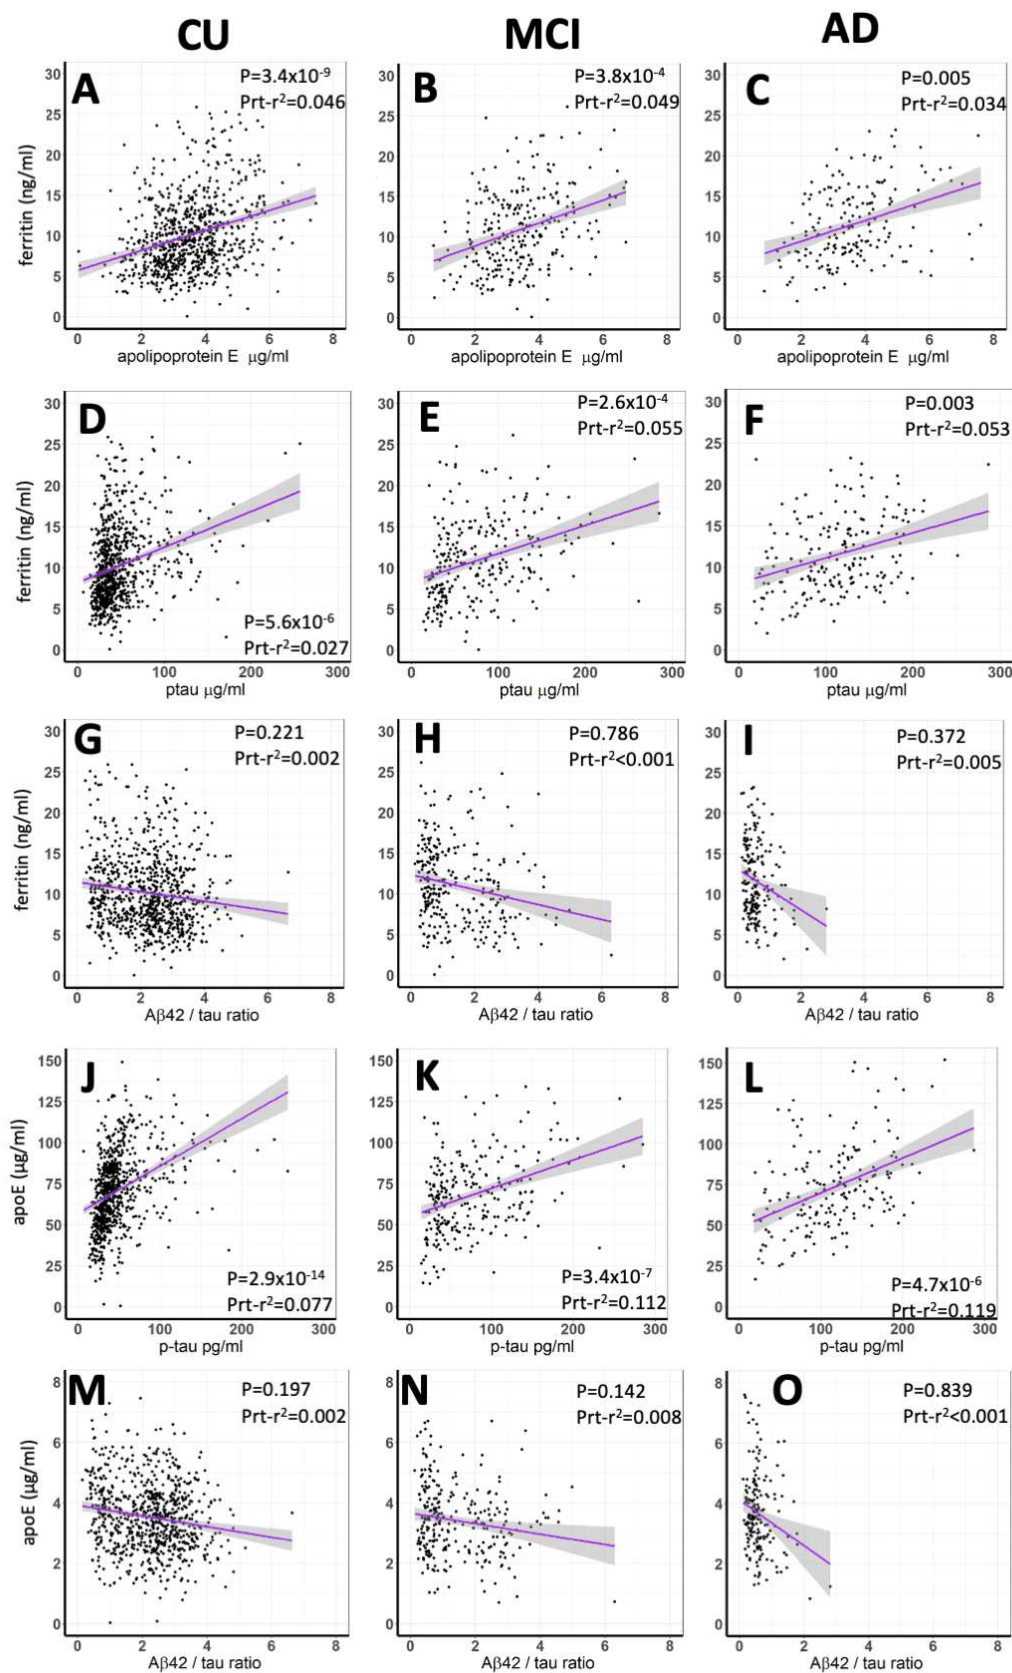

**Supplementary Figure 2. Correlations between ferritin, apoE, p-tau and A $\beta_{42}$ /t-tau in subjects from the BioFINDER cohort stratified by cognitive severity.** Statistics are from multiple regression model of either ferritin or apoE, including age, sex, *APOE*  $\epsilon 4$ , p-tau, A $\beta_{42}$ /t-tau and either ferritin or apoE. Prt- $r^2$  represents the partial  $r^2$ .

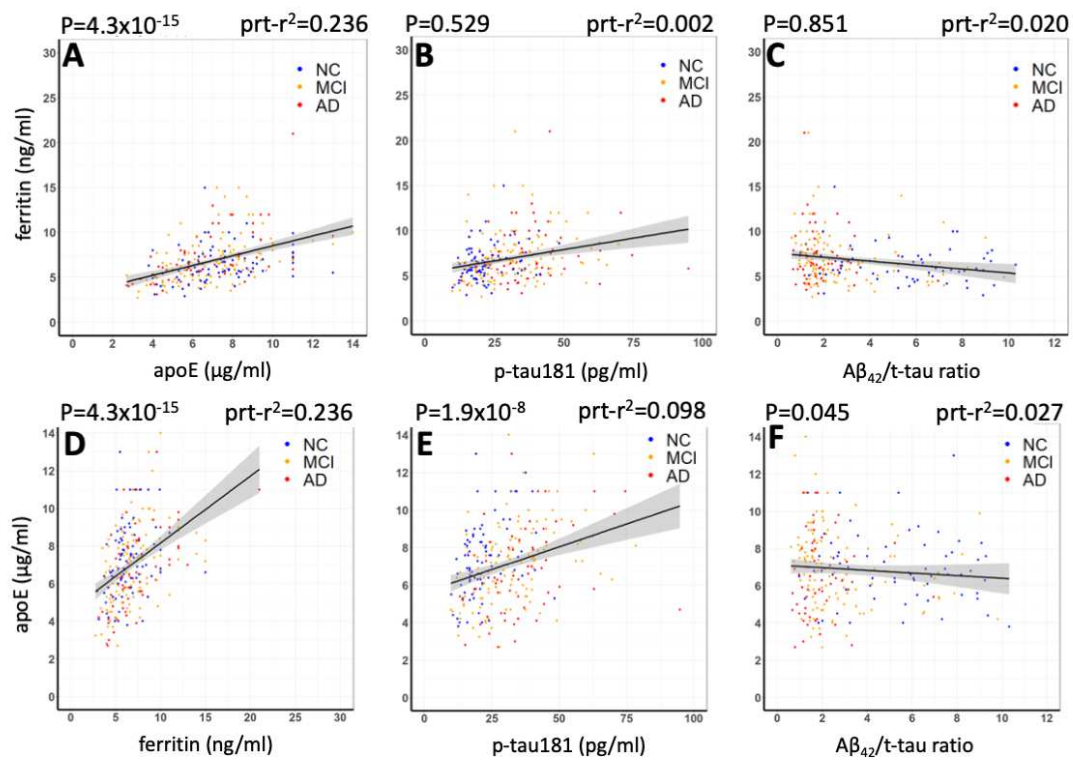

**Supplementary Figure 3. Correlations between ferritin, apoE, p-tau and Aβ<sub>42</sub>/t-tau in subjects from the ADNI cohort.** Statistics are from multiple regression model of either ferritin or apoE, including age, sex, APOE ε4, p-tau, Aβ<sub>42</sub>/t-tau and either ferritin or apoE. prt-r<sup>2</sup> represents the partial r<sup>2</sup>.
